# Supplementary material
Source: Springer Nature journal article supplement (https://www.springermedizin.de/resource/supplementary/12967_2008_307_MOESM10_ESM.pdf/9576168)

**A**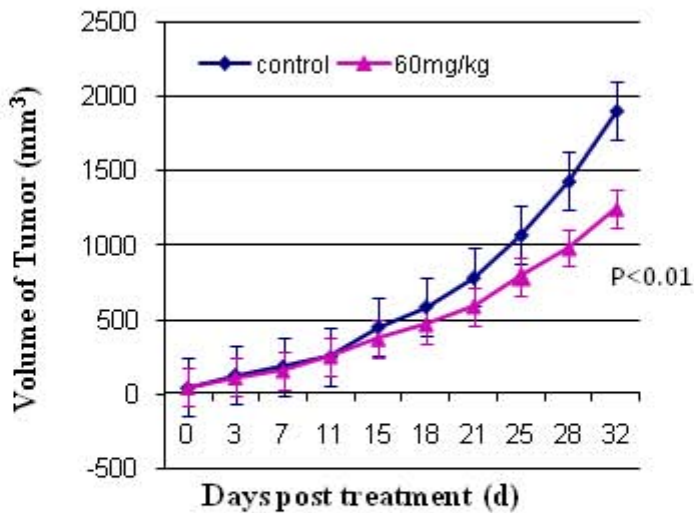**B**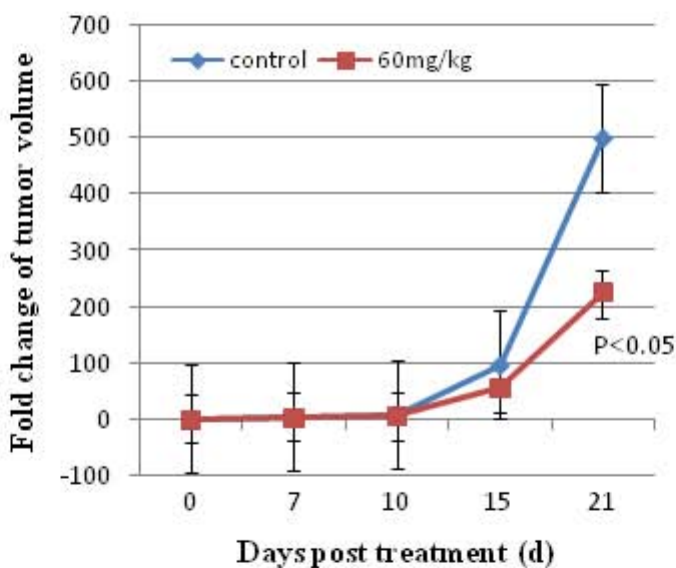**C**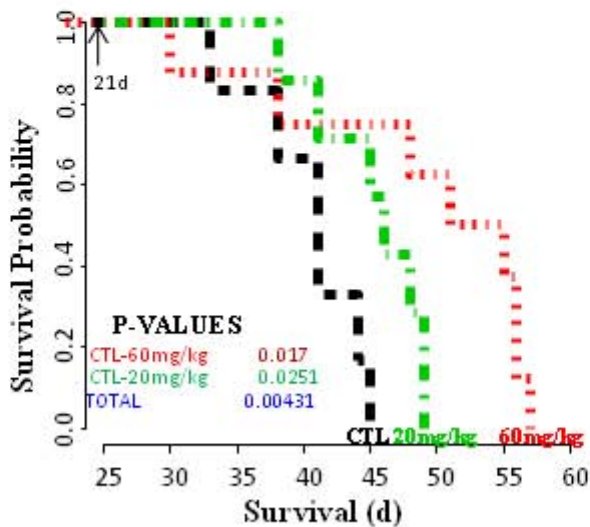

Supplement: MOESM10 [file 9576168]
